# Supplementary material for: Osteoimmunity-regulating nanosilicate-reinforced hydrogels for enhancing osseointegration
Source: Royal Society of Chemistry journal article supplement (doi:10.1039/d3tb01509b), 2023-01-01
Supplement: d3tb01509b1.pdf [file d3tb01509b1.pdf]

## Supporting Information

### **Osteoimmunity-regulating nanosilicate-reinforced hydrogel for enhancing osseointegration**

Yuanyuan Li <sup>a, b</sup>, Guangmei Yang <sup>a, b</sup>, Yuting Wang, Yahong Li <sup>a, b</sup>, Shu Zhang <sup>a, b</sup>,  
Ruyi Li <sup>a, b</sup>, Linxin Yang <sup>a, b</sup>, Jian Wang <sup>a, b</sup>, Xibo Pei <sup>a, b</sup>, Qianbing Wan<sup>a, b,\*</sup>, Junyu  
Chen <sup>a, b, \*</sup>

a State Key Laboratory of Oral Diseases, National Clinical Research Center for Oral Diseases, Chengdu 610041, China

b Department of Prosthodontics, West China Hospital of Stomatology, Sichuan University, Chengdu 610041, China

\* Corresponding authors at: junyuchen@scu.edu.cn (Prof.J.Y.Chen),  
champion@scu.edu.cn (Prof. Q.B. Wan).

**Table S1.** Composition of different groups of hydrogels

| Biohydrogel                 | CaCl <sub>2</sub> | MMT   | SA    | HM       |
|-----------------------------|-------------------|-------|-------|----------|
| SA                          | 2 wt%             | /     | 3 wt% | /        |
| SA/MMT(SM)                  | 2 wt%             | 1 wt% | 3 wt% | /        |
| SA/MMT/HM-low<br>(SMH-l)    | 2 wt%             | 1 wt% | 3 wt% | 4 μg/ml  |
| SA/MMT/HM-middle<br>(SMH-m) | 2 wt%             | 1wt%  | 3 wt% | 8 μg/ml  |
| SA/MMT/HM-High<br>(SMH-h)   | 2 wt%             | 1wt%  | 3 wt% | 16 μg/ml |

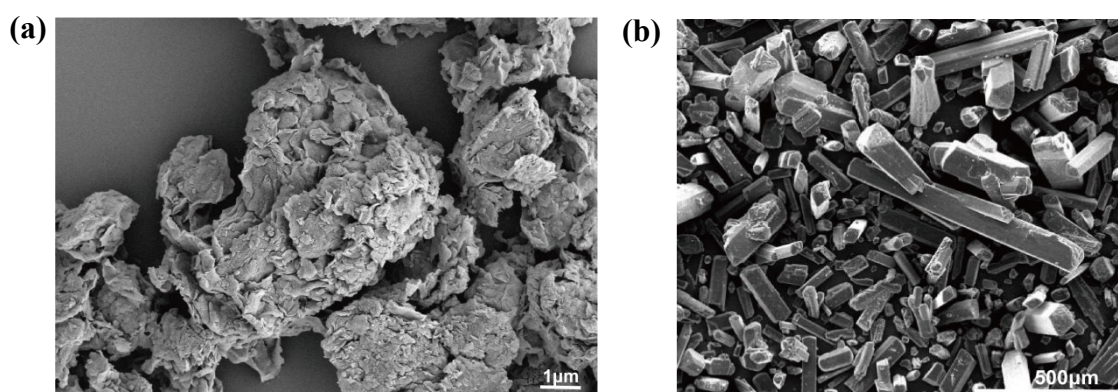

**Figure S1.** SEM images of (a) MMT (scale bar: 1 μm) and (b) HM (scale bar: 500 μm).

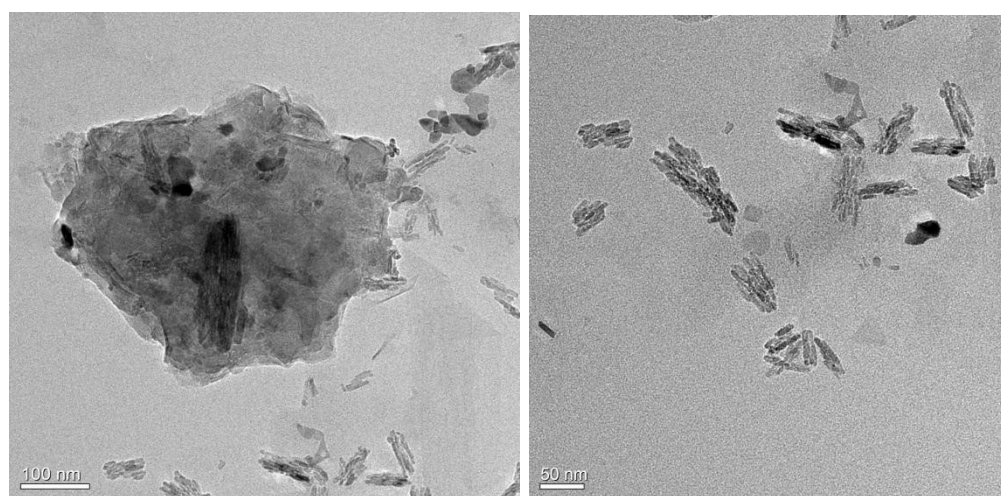

**Figure S2.** TEM images of MMT (scale bar: 100 nm, left; scale bar: 50 nm, right).

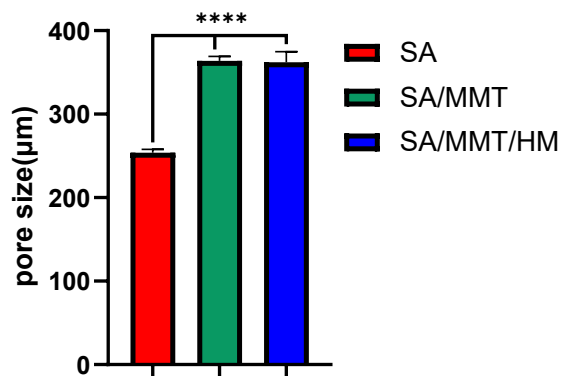

**Figure S3.** Pore size of SA, SM and SMH hydrogels calculated from the SEM images.

\*\*\*\*P < 0.0001

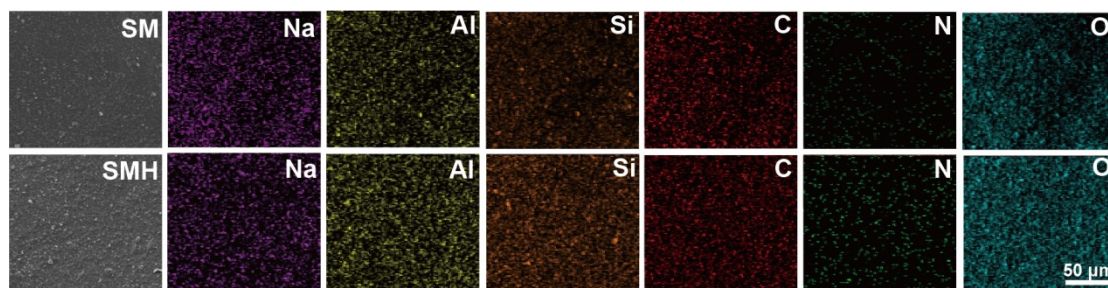

**Figure S4.** Elemental mapping images of SM and SMH (scale bar: 50 µm).

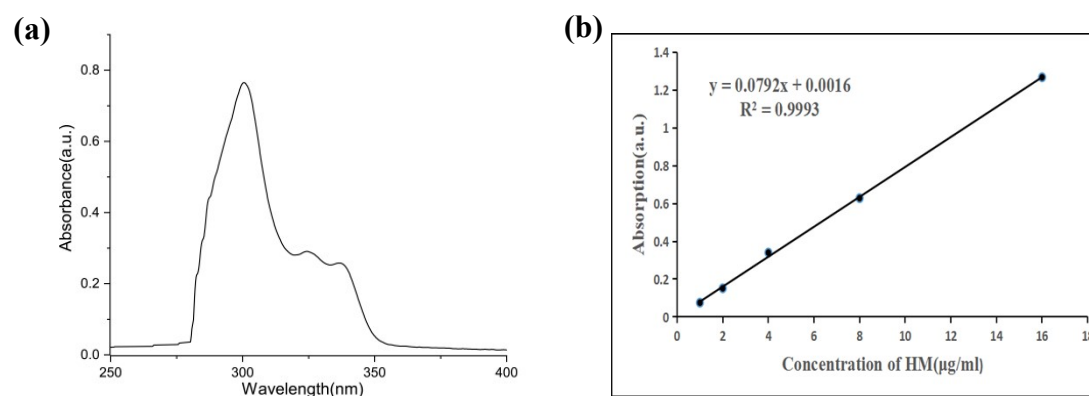

**Figure S5.** (a) The absorbance spectra of HM. (b) The standard curve of HM detected at 301 nm.

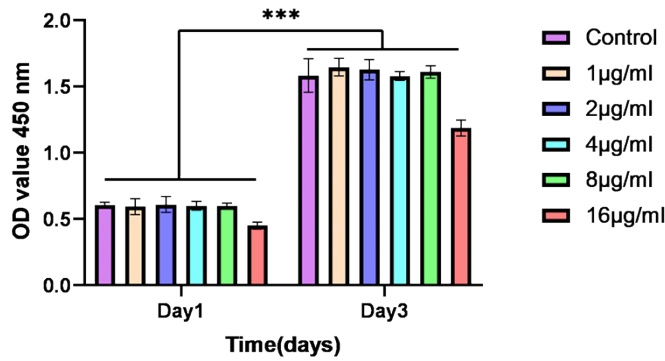

**Figure S6.** CCK8 assay was used for evaluating cell proliferation following treatment with different concentrations of harmine. \*\*\* $p < 0.001$

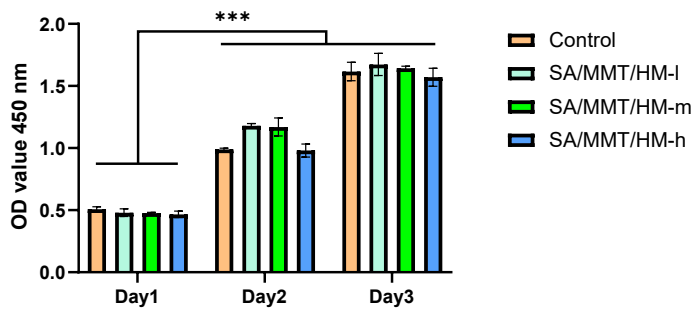

**Figure S7.** CCK8 assay was used to evaluate the proliferation of RAW264.7 cultured in hydrogel lixivium for 1, 2 and 3 days . \*\*\* $p < 0.001$

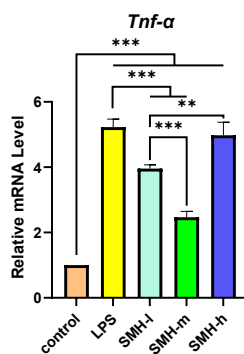

**Figure S8.** Selecting the optimal concentration group of SMH by inflammatory-related genes test. The mRNA expression levels of TNF- $\alpha$ . \* $P < 0.05$  and \*\* $P < 0.01$ , \*\*\* $P < 0.001$

**Table S2.** Primers used in the qRT-PCR.

| Gene name     | 5'→3'(Forward)            | 5'→3'(Reverse)          |
|---------------|---------------------------|-------------------------|
| GAPDH(mouse)  | TTCCTACCCCAATGTATCCG      | CATGAGGTCCACCACCCTGTT   |
| TNF- $\alpha$ | CCCTCACACTCAGATCATCTTCT   | GCTACGACGTGGGCTACAG     |
| IL-1 $\beta$  | TGCCACCTTTTGACAGTGATG     | AAGGTCCACGGGAAAGACAC    |
| CD86          | TGGGCGCAGAGAACTTGAT       | AAGCCCGTGTCTTGATCTG     |
| IL-6          | CAATAGAAGACTGTGAGCATC     | CCCATAATCAGCCACCAAACC   |
| IL-10         | GCTCTTACTGACTGGCATGAG     | CGCAGCTCTAGGAGCATGTG    |
| PDGF-B        | CCTGAGGAACTCTATGAAATGCTGA | GGCGATTACGGCAGGCTCT     |
| CD206         | TGCCTACTGCCTGCCCTAATC     | GTCCCATCGCTCCACTCAAAG   |
| BMP2          | AACGAGAAAAGCGTCAAGCC      | AGGTGCCACGATCCAGTCAT    |
| Arg2          | ACATTGGCTTGCAGACGTA       | ATCACCTTGCCAATCCCCAG    |
| BMP6          | AGCGACACCACAAAGAGTTCA     | GCTGATGCTCCTGTAAGACTTGA |
| ACTB(Rat)     | CTCTGTGTGGATTGGTGGCT      | CGCAGCTCAGTAACAGTCCG    |
| OCN2          | TTATTGTTTGAGGGGCCTGGG     | ACACAACCTGCAGGTCGAGTTT  |
| OPN           | AATGTGCTCCTGGCACCTAC      | GCATTCATCACTCGTGTGCC    |
| ALP3          | GGCGTCCATGAGCAGAACTACATC  | CAGGCACAGTGGTCAAGGTTGG  |
| OSX           | GCCTACTTACCCGTCTGACTTTGC  | CCCTCCAGTTGCCCACTATTGC  |
| Runx2         | CCGTGGCCTTCAAGGTTGTA      | ATTCGTAGCTCGGCAGAGTAGTT |

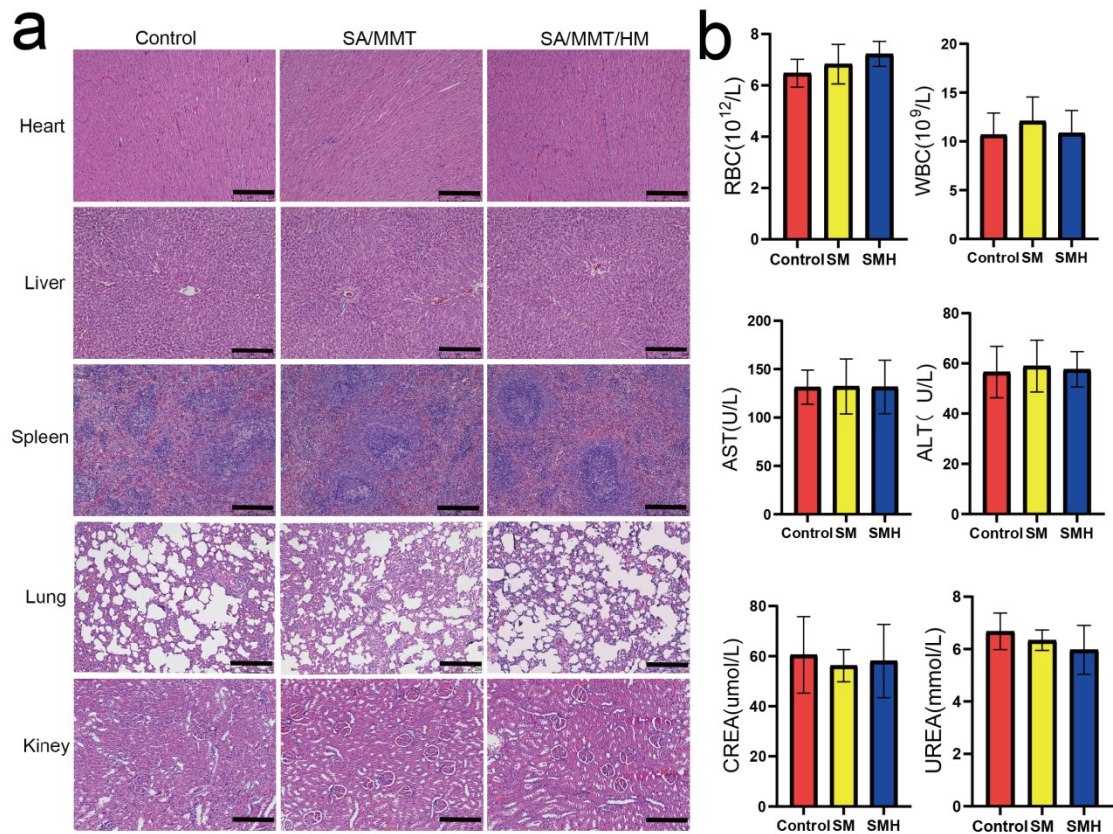

**Figure S9.** *In vivo* biocompatibility evaluation of SA/MMT/HM. a) H&E staining assessments of rat major organs (heart, liver, spleen, lung, and kidney) after implantation with the hydrogel at the cranial defect site for 4 weeks (scale bar: 200  $\mu$ m) b) Partial hematological analysis of rat peripheral blood. All statistical data are presented as mean  $\pm$  SD (n = 3).

**Table S3.** Antibodies used in immunofluorescence staining of tissues.

| Brand and code       | Name of primary antibodies                                                         | Abbreviation  | Host   | Secondary antibodies |
|----------------------|------------------------------------------------------------------------------------|---------------|--------|----------------------|
| Abcam, ab125212      | Anti-CD68 antibody                                                                 | CD68          | rabbit | Rabbit 647           |
| Sigma-Aldrich, C6198 | Anti-Actin, $\alpha$ -Smooth Muscle - Cy3 <sup>TM</sup> antibody, Mouse monoclonal | $\alpha$ -SMA | mouse  | /                    |
| HUABIO, ET1601-21    | Alkaline Phosphatase Recombinant Rabbit Monoclonal Antibody [SA40-00]              | ALP           | rabbit | Rabbit 647           |

|                     |                                 |      |        |            |
|---------------------|---------------------------------|------|--------|------------|
| HUABIO, ER80602     | BMP2 Rabbit Polyclonal Antibody | BMP2 | rabbit | Rabbit 647 |
| Servicebio, GB11233 | Anti-Osteocalcin Rabbit pAb     | OCN  | rabbit | Rabbit 647 |

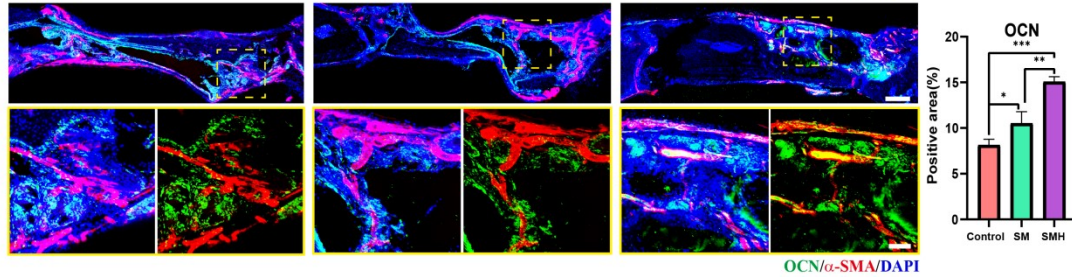

**Figure S10.** Immunofluorescence staining of cranial defect sections stained with OCN and corresponding quantitative analysis of immunofluorescence staining results. Red ( $\alpha$ -SMA), green (OCN), and blue (DAPI). (scale bar: 200  $\mu$ m, up; scale bar: 50  $\mu$ m, down).

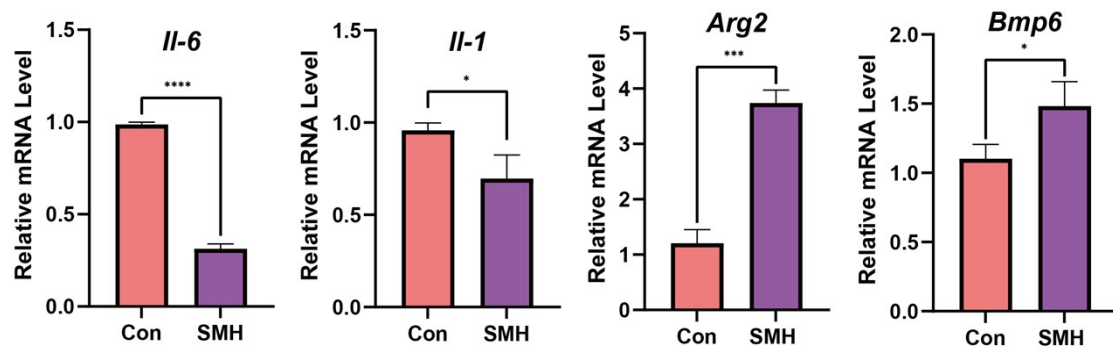

**Figure S11.** The mRNA expression levels of M1 macrophage-related genes (*Il-6*, *Il-1*) and M2 macrophage-related genes (*Arg2*, *Bmp6*). (n=3, \*P < 0.05 and \*\*P < 0.01, \*\*\*P < 0.001, \*\*\*\*P < 0.0001).
